# Supplementary material for: Photothermal-triggered shape memory coatings with active repairing and corrosion sensing properties
Source: Royal Society of Chemistry journal article supplement (doi:10.1039/d1ta05761h), 2021-01-01
Supplement: d1ta05761h1.pdf [file d1ta05761h1.pdf]

## Supporting Information

# Photothermal-triggered shape memory coatings with active repairing and corrosion sensing properties

*Li Cheng<sup>1,2</sup>, Chengbao Liu<sup>3</sup>, Haichao Zhao<sup>1,\*</sup>, Liping Wang<sup>1,\*</sup>*

<sup>1</sup> Key Laboratory of Marine Materials and Related Technologies, Zhejiang Key Laboratory of Marine Materials and Protective Technologies, Ningbo Institute of Materials Technology and Engineering, Chinese Academy of Sciences, Ningbo 315201, China;

<sup>2</sup> University of Chinese Academy of Sciences, Beijing 100039, China;

<sup>3</sup> Corrosion Laboratory for Light Metals, College of Materials Science and Engineering, Shandong University of Science and Technology, Qingdao 266590, China;

\* Corresponding Authors: Prof. Haichao Zhao and Prof. Liping Wang

E-mail: [zhaohaichao@nimte.ac.cn](mailto:zhaohaichao@nimte.ac.cn) (Haichao Zhao) and [wangliping@nimte.ac.cn](mailto:wangliping@nimte.ac.cn) (Liping Wang)

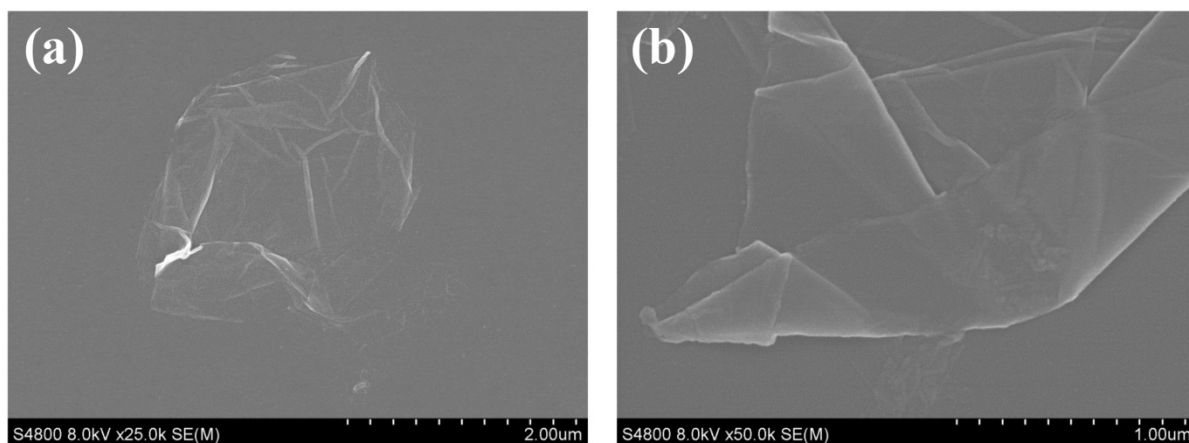

Fig. S1 SEM images of (a) GO and (b) PPG nanosheets.

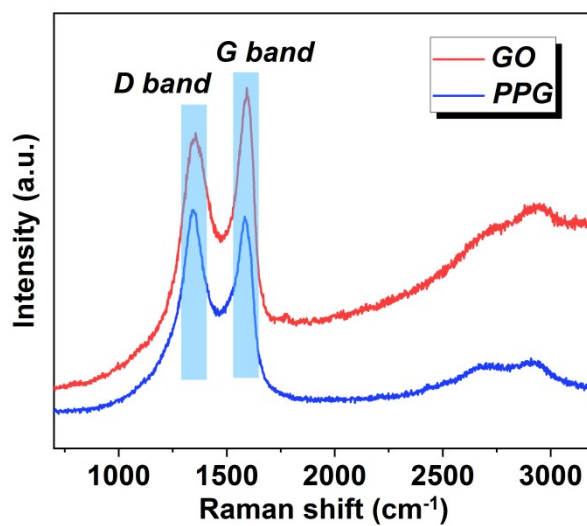

Fig. S2 Raman spectra of GO and PPG nanosheets under 532 nm of excitation wavelength.

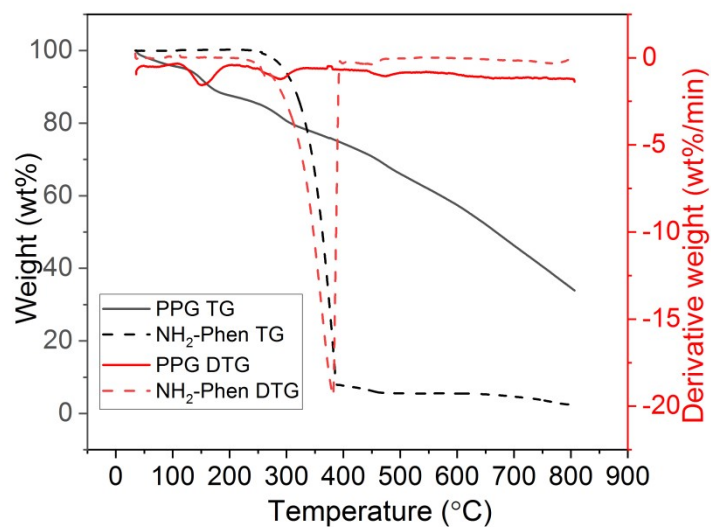

Fig. S3 Thermal gravity (TG) and differential thermal gravity (DTG) analysis of NH<sub>2</sub>-Phen and PPG nanosheets.

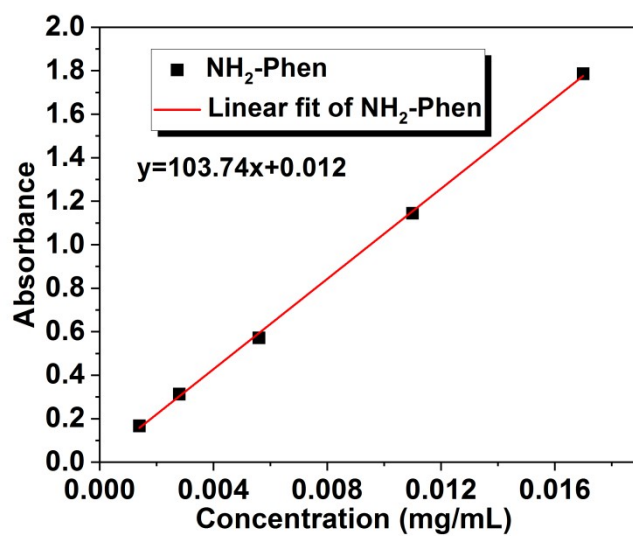

Fig. S4 The linear relationship between absorbance and concentration of NH<sub>2</sub>-Phen in 3.5 wt% NaCl solution.

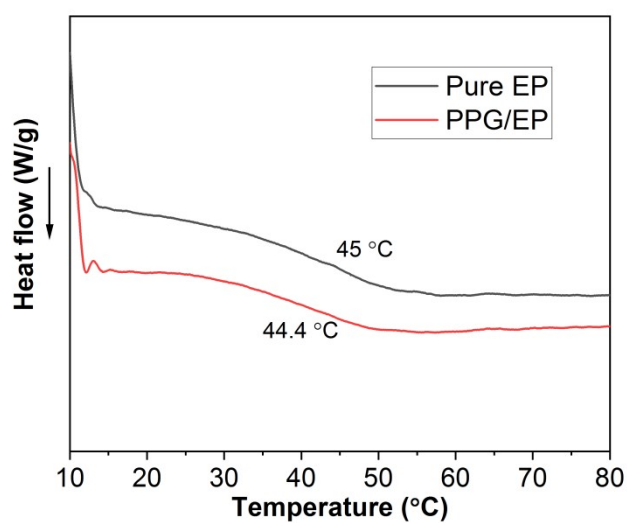

Fig. S5 Differential scanning calorimeter (DSC) heating curves of pure EP and PPG/EP.

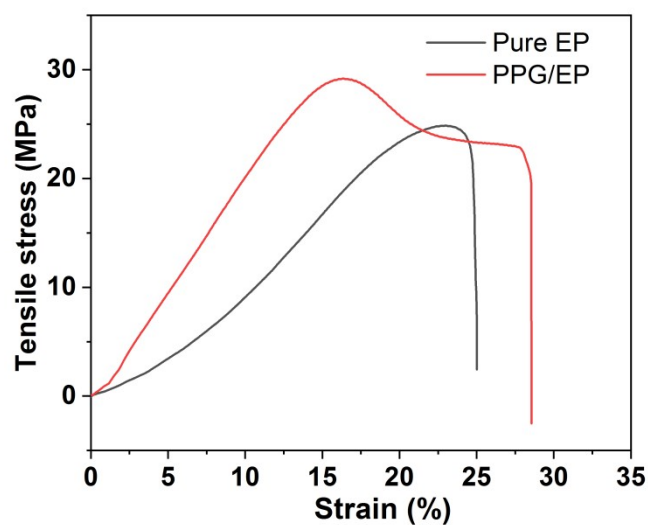

Fig. S6 Stress-strain curves of pure EP and PPG/EP at room temperature.

Table S1 Material properties of pure EP and PPG/EP.

| Samples | Tensile strength (MPa) | Strain at break (%) | Toughness (MJ m <sup>-3</sup> ) | Adhesion strength (MPa) | Coefficient of thermal expansion (20 to 120 °C, ppm/°C) |
|---------|------------------------|---------------------|---------------------------------|-------------------------|---------------------------------------------------------|
| Pure EP | 24.8 ± 1.8             | 23.3 ± 1.3          | 4.3 ± 0.2                       | 8.5 ± 0.3               | 127                                                     |
| PPG/EP  | 29.2 ± 2.2             | 27.7 ± 2.1          | 8.4 ± 0.3                       | 9.6 ± 0.8               | 132                                                     |

Table S2 Surface temperature of coatings with different PPG content after irradiating for 90 s (0.8 W/cm<sup>2</sup>).

| PPG content (wt%)        | 0    | 0.5  | 1   | 2   |
|--------------------------|------|------|-----|-----|
| Maximum temperature (°C) | 19.6 | 55.6 | 105 | 107 |

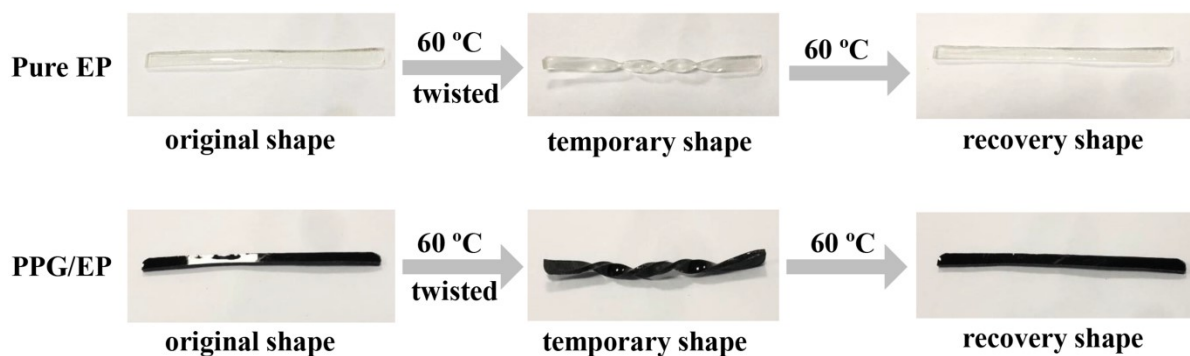

Fig. S7 Shape memory behaviors of Pure EP and PPG/EP. Shape programming was achieved by heating the polymers to 60 °C, and followed by cooling to room temperature.

Shape recovery process was achieved by reheating the samples to 60 °C.

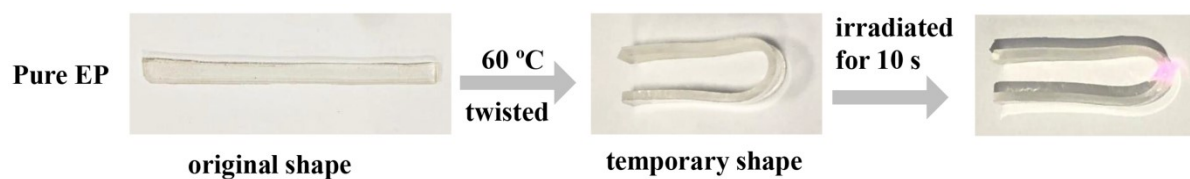

Fig. S8 The failed shape recovery process of pure EP under 10 s of NIR irradiation.

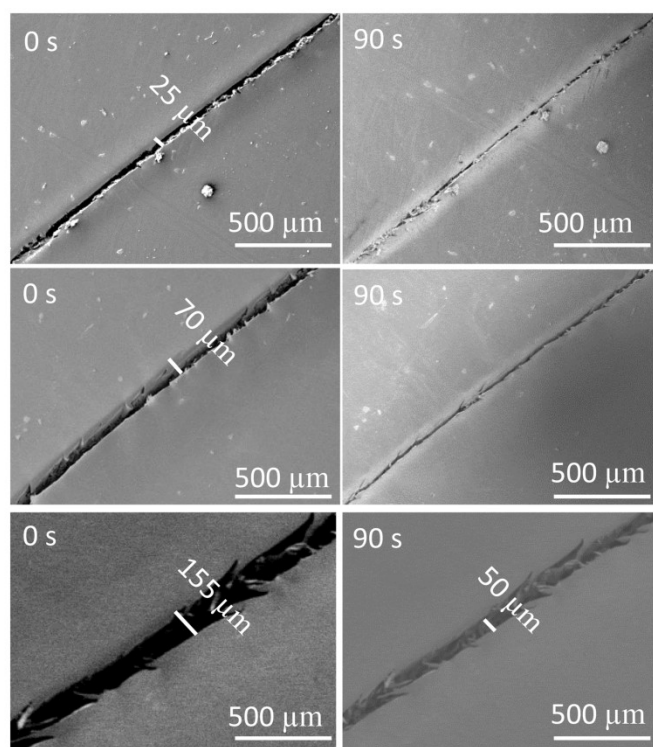

Fig. S9 SEM images of PPG/EP with different crack width after 90 s of NIR irradiation ( $0.8 \text{ W/cm}^2$ ).

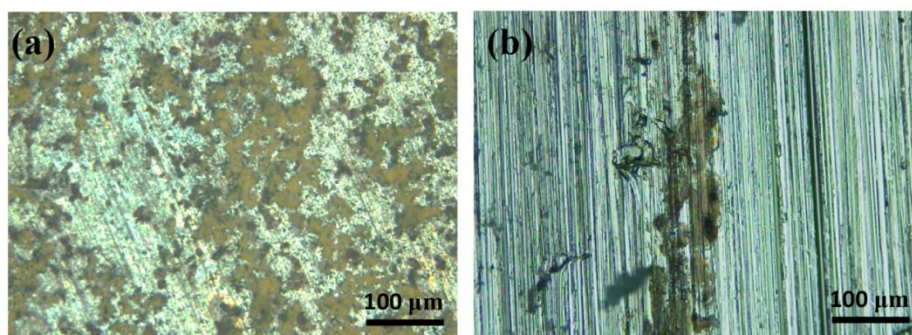

Fig. S10 Optical images of carbon steels immersed in 3.5 wt% NaCl solution for 24 h: (a) without Phen, (b) with Phen.

Table S3 Comparison of the anticorrosion performance of the scratched coatings in neutral NaCl solution (for carbon steel substrates).

| Coatings                                       | Immersion time | $Z_{f=0.01\text{ Hz}} (\Omega \text{ cm}^2)$ | Reference                                                               |
|------------------------------------------------|----------------|----------------------------------------------|-------------------------------------------------------------------------|
| Irradiated PPG/EP                              | 1 h            | $4.24 \times 10^6$                           | This work                                                               |
|                                                | 15 days        | $4.15 \times 10^5$                           |                                                                         |
| MSNs–BTA@PDA/<br>water-borne alkyd<br>coatings | 1 day          | $7.4 \times 10^4$                            | Ref. 59                                                                 |
|                                                |                |                                              | <i>ACS Appl. Mater. Interfaces</i> , 2019, <b>11</b> , 10283            |
| GO-PDA-Zn/EP                                   | 120 h          | $5.8 \times 10^4$                            | Ref. 71<br><i>Chem. Eng. J.</i> 2020, <b>391</b> , 123630               |
| GO/ZIF-8/Epoxy                                 | 72 h           | $7.9 \times 10^4$                            | Ref. 72<br><i>Carbon</i> 2020, <b>161</b> , 231                         |
| ZHM-E3/EP                                      | 7 days         | $1.5 \times 10^5$                            | Ref. 73<br><i>ACS Appl. Mater. Interfaces</i> , 2020, <b>12</b> , 19823 |
| PMB/EP                                         | 15 days        | $1.77 \times 10^5$                           | Ref. 74<br><i>J. Mater. Sci. Technol.</i> 2021, <b>80</b> , 36          |

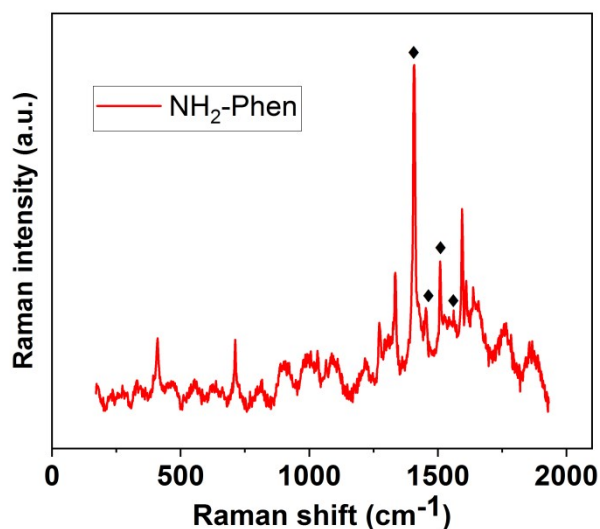

Fig. S11 Raman spectrum of NH<sub>2</sub>-Phen powders.

Table S4 Comparison of functional properties between the work and reported smart

anticorrosion coatings.

| Coatings                               | First repair step-“close” | Second healing step-“healing” | Corrosion sensing | Reference                                                              |
|----------------------------------------|---------------------------|-------------------------------|-------------------|------------------------------------------------------------------------|
| PPG/EP                                 | Yes                       | Yes                           | Yes               | This work                                                              |
| Microcapsule/polymer                   | No                        | Yes                           | No                | Ref. 3<br><i>Adv. Mater.</i> , 2009, <b>21</b> , 645                   |
| PUU-g-C <sub>3</sub> N <sub>4</sub> NS | Yes                       | Yes                           | No                | Ref. 6<br><i>J. Mater. Chem. A</i> , 2018, <b>6</b> , 5887             |
| BTA/SMP                                | Yes                       | Yes                           | No                | Ref. 8<br><i>J. Mater. Chem. A</i> , 2017, <b>5</b> , 2355             |
| Polyelectrolyte/inhibitor sol-gel      | No                        | Yes                           | No                | Ref. 11<br><i>Adv. Mater.</i> , 2008, <b>20</b> , 2789                 |
| Silicon/polyelectrolyte/BTA sol-gel    | No                        | Yes                           | No                | Ref. 12<br><i>Chem. Mater.</i> , 2007, <b>19</b> , 402                 |
| MSNPS-SNAP                             | Yes                       | Yes                           | No                | Ref. 13<br><i>J. Mater. Chem. A</i> , 2016, <b>4</b> , 8041            |
| SF-SHAC                                | No                        | Yes                           | No                | Ref. 15<br><i>ACS Appl. Mater. Interfaces</i> , 2019, <b>11</b> , 4425 |
| PCL-SMASH                              | Yes                       | Yes                           | No                | Ref. 18<br><i>ACS Macro. Lett.</i> , 2013, <b>2</b> , 152              |
| CNT hybrids                            | Yes                       | No                            | No                | Ref. 27<br><i>ACS Appl. Mater. Interfaces</i> , 2017, <b>9</b> , 27213 |
| PMA-X-1                                | No                        | No                            | Yes               | Ref. 35<br><i>Nat. Chem.</i> , 2012, <b>4</b> , 559                    |
| SP mechanophores                       | No                        | No                            | Yes               | Ref. 36<br><i>J. Am. Chem. Soc.</i> , 2010, <b>132</b> , 16107         |
| Encapsulated DCF/epoxy                 | No                        | No                            | Yes               | Ref. 38<br><i>Adv. Mater.</i> , 2016, <b>28</b> , 2189                 |



---

|                    |    |     |     |                                                            |
|--------------------|----|-----|-----|------------------------------------------------------------|
| Microcapsule/epoxy | No | Yes | Yes | Ref. 40<br><i>Chem. Mater.</i> , 2019, <b>31</b> ,<br>2611 |
|--------------------|----|-----|-----|------------------------------------------------------------|

---
